# Supplementary material for: How well do services for young people with long term conditions deliver features proposed to improve transition?
Source: PubMed Central journal article supplement (PMC5941647; doi:10.1186/s12913-018-3168-9), 2018-05-08
Supplement: 12913_2018_3168_MOESM2_ESM.pdf [file 12913_2018_3168_MOESM2_ESM.pdf]

**Additional file 2**

**File name: Colver April 2018 Supplementary Material 2.pdf**

**Title: CLINIC/SERVICE MODELS**

**Description of data: Questionnaire about transition service provided at each site.**

**CLINIC/SERVICE MODELS  
Transition Longitudinal Study**

As part of the Transition Programme longitudinal study, we need to document the service models each year so that we can identify changes during the course of the study.

Also it may be useful to know if there are major discrepancies between how the patient and the service perceives the service.

We ask you to provide information which reflects your current practice **over the last year** (i.e. 2012/2013) rather than proposed service developments.

The questions are about the clinics in which young people eligible to take part in the Transition Longitudinal Study have been seen in the last year. That is, young people with

- (1) diabetes, or
- (2) cerebral palsy, or
- (3) autism spectrum disorder (ASD) with additional mental health difficulties (and with average range intellectual ability or at most mild learning disability).

At recruitment the young people were aged 14 years to 18 years 11 months and pre-transfer to their adult healthcare.

We expect that one person will complete the questionnaire, but we think it would be helpful to discuss the answers within your service/clinic team.

Allan Colver and Helen McConachie

**NB: Please answer with respect to a single site or service team.**

|                                                                                                       |  |
|-------------------------------------------------------------------------------------------------------|--|
| <b>Centre, Hospital Site or Service name, and Trust name</b>                                          |  |
| <b>Clinic name</b>                                                                                    |  |
| <b>Transition grouping:</b><br>1. Diabetes<br>2. Cerebral Palsy<br>3. ASD with mental health problems |  |
| <b>Date of completion of questionnaire</b>                                                            |  |
| <b>Name of lead Consultant(s)</b>                                                                     |  |
| <b>Name of person completing the form (if different from above)</b>                                   |  |

**CURRENT SERVICE PROVISION**

**1. At what type of clinic has your service seen the young people recruited to the Transition study?**

*Please tick and give age criteria. Please put a cross against any type you provide*

**Clinics**

| <b>Clinic type:</b>                                       | <b>Age criteria for the clinic</b> |
|-----------------------------------------------------------|------------------------------------|
| Children and young people (all ages)                      |                                    |
| Dedicated adolescent (defined as 11+ yrs)                 |                                    |
| Joint transition clinic (shared staff with adult service) |                                    |

**TRANSITION COORDINATION**

**3. Is there a person (who may or may not be an actual clinical team member) who has a specific transition coordinating role for the clinic or service (i.e. not a key worker for individual young people)?**

- 1. Paediatric team member..... YES  / NO
- 2. Adult team member ..... YES  / NO

If YES, is this defined in their job description and job plan? YES  / NO

**CURRENT TRANSITION MODEL**

What is the **PREDOMINANT** current transition model in your service? (Choose one option only; this includes the option for mixed provision under **Other**.)

(i) **Single doctor?** ..... YES   
(Dually trained consultant. Patient moves from paediatric to adult clinic but remains under same consultant throughout)

If **YES**, does the whole team remain the same or are there changes in nurse, psychologist, occupational therapist, etc? ..... YES   
Please give details.....  
.....

(ii) **Combined clinic?** ..... YES   
(Different paediatric and adult teams but includes combined clinic at one site from which young people are moved into the adult service)

What is the average duration the young person remains in combined clinic prior to transfer to adult service?.....

(iii) **Paediatric to adult teams – direct transfer** ..... YES   
(Different teams, no overlap)

(iv) **Age banded clinics throughout – a ‘developmental model’** ..... YES   
(e.g. 0-11 to adolescent clinic (11+) to adult service (18=) +/- an interim young adult clinic (16-25) in the adult setting)

(v) **No adult service (i.e. responsibility reverts to young person and GP)** YES

(vi) **Other** ..... YES   
(Please give details including if it is a combination of some of the above)  
.....  
.....  
.....  
.....

## SPECIFIC ASPECTS OF SERVICE

|                                                                                                                                                                                                                                                                                                                                                                  | YES | NO | Comments | Not applicable |
|------------------------------------------------------------------------------------------------------------------------------------------------------------------------------------------------------------------------------------------------------------------------------------------------------------------------------------------------------------------|-----|----|----------|----------------|
| Young people have an opportunity <b>to meet members of the adult team</b> before transfer of care                                                                                                                                                                                                                                                                |     |    |          |                |
| If YES                                                                                                                                                                                                                                                                                                                                                           |     |    |          |                |
| In joint clinic                                                                                                                                                                                                                                                                                                                                                  |     |    |          |                |
| Or                                                                                                                                                                                                                                                                                                                                                               |     |    |          |                |
| Meeting outside a joint clinic                                                                                                                                                                                                                                                                                                                                   |     |    |          |                |
| Staff discuss with young people and parents the level at which they wish <b>parents</b> to be involved in consultations                                                                                                                                                                                                                                          |     |    |          |                |
| Individualized <b>transition plans</b> are routinely used for all patients in the service.                                                                                                                                                                                                                                                                       |     |    |          |                |
| The service has a protocol for promoting <b>health self-efficacy</b> (i.e. actively helping young people to feel confident in managing their health condition).                                                                                                                                                                                                  |     |    |          |                |
| The service ensures that each young person has <b>a key worker</b> , i.e. a single person they approach to sort out any problems around their health care (may not be formally allocated, and may not be a health provider but in close touch with health services)                                                                                              |     |    |          |                |
| Young people can see a variety of professionals (such as doctor, psychologist, therapist, dietician, where appropriate) on the same day or place (i.e. <b>a coordinated team</b> )                                                                                                                                                                               |     |    |          |                |
| The service provides formal training in thinking about and planning for the future (i.e. relationships, education, training, work, finances, etc.), or checks that the young person has opportunity to access such training ( <b>Holistic life-skills training</b> ). This is training related to having their condition, but not just managing their condition. |     |    |          |                |

ND questions about age banded clinics and transition manager for clinical team are on Page 2

**ADULT SERVICES**

Please provide details of the adult clinic/service you most frequently refer young people on to.

Clinic service or name?.....

Name (s) of consultant(s).....

Hospital or setting.....

NHS Trust.....

Clinic service or name?.....

Name (s) of consultant(s).....

Hospital or setting.....

NHS Trust.....

**PLEASE ADD ANY ADDITIONAL COMMENTS**

**Thank you very much for your time and cooperation.**

**Please return this survey to:**

**XXXXXXXXXXXX**

**Transition**

**Newcastle University, Institute of Health and Society**

**Sir James Spence Institute 3<sup>rd</sup> floor**

**Royal Victoria Infirmary, Queen Victoria Road,**

**Newcastle upon Tyne NE1 4LP**
