# Supplementary material for: How well do services for young people with long term conditions deliver features proposed to improve transition?
Source: Springer Nature journal article supplement (doi:10.1186/s12913-018-3168-9), 2018-05-08
Supplement: MOESM1 [file 15746382]

|                    |  |
|--------------------|--|
| Participant ID     |  |
| Date and Visit     |  |
| Research Associate |  |

**Additional file 1**

**File name: Colver April 2018 Supplementary Material 1.pdf**

**Title: Beneficial Features Data Summary for Previous Year**

**Description of data: Questionnaire about exposure to proposed beneficial features.**

**Questions to be completed by researcher and young person together**

|                        |                                                                                                                                                                                                        |                 |                                            |
|------------------------|--------------------------------------------------------------------------------------------------------------------------------------------------------------------------------------------------------|-----------------|--------------------------------------------|
| Transition clinic      | Have you attended a clinic that was just for young people/adolescents, or young adults, or a joint clinic with staff from both child and adult services?                                               |                 |                                            |
|                        | Yes                                                                                                                                                                                                    |                 | No                                         |
|                        | <i>If yes, circle any that apply:</i> Adolescent Joint Young Adult                                                                                                                                     |                 |                                            |
| Adult team             | Did you meet the adult team or anyone from the adult team while planning to move, or before you moved, to adult services?                                                                              |                 |                                            |
|                        | Yes                                                                                                                                                                                                    |                 | No                                         |
|                        | <i>If yes, circle any that apply:</i> Joint Met for introduction                                                                                                                                       |                 |                                            |
| Self-efficacy          | Have you <u>received enough help</u> from the health services to increase your confidence in managing your condition?                                                                                  |                 |                                            |
|                        | Enough help                                                                                                                                                                                            | Not enough help | Did not need help                          |
| Plan                   | Do you have/have you had a written transition plan that talks about your health services?                                                                                                              |                 |                                            |
|                        | Yes                                                                                                                                                                                                    |                 | No                                         |
|                        | <i>TP may be held in the medical notes; possibly separate page with heading, or checklist/questionnaire. If YP has a plan created in education, check it also includes mention of health services.</i> |                 |                                            |
| Parent involvement (a) | Has your parent/carer been involved and consulted in your healthcare transition?                                                                                                                       |                 |                                            |
|                        | Yes                                                                                                                                                                                                    |                 | No                                         |
| (b)                    | Was it at the right level?                                                                                                                                                                             |                 | Was it at the right level?                 |
|                        | Yes                                                                                                                                                                                                    | No, too little  | No, too much                               |
|                        |                                                                                                                                                                                                        |                 | Yes No, too little                         |
| Key worker             | Have you got or had a key worker who works with you? i.e. a single person you approach to sort out any problems around your health care?                                                               |                 |                                            |
|                        | Yes                                                                                                                                                                                                    |                 | No                                         |
|                        | <i>If yes, note who it is, and profession:</i>                                                                                                                                                         |                 |                                            |
|                        | <i>The KW can be from another service, but it is recognised that they can influence health provision. If the YP does not know the profession, please find out.</i>                                     |                 |                                            |
| Coordination           | Can you see a variety of professionals (such as doctor, psychologist, therapist or dietician) on the same day or place?                                                                                |                 |                                            |
|                        | Yes                                                                                                                                                                                                    | No              | No – only in contact with one professional |
|                        | <i>Add comments</i>                                                                                                                                                                                    |                 |                                            |
|                        | <i>The point is whether they seem to work as a team, so note any comment about 'they don't seem to</i>                                                                                                 |                 |                                            |

|                                                                                           |                                                                                                                                                                                                                                                                                |
|-------------------------------------------------------------------------------------------|--------------------------------------------------------------------------------------------------------------------------------------------------------------------------------------------------------------------------------------------------------------------------------|
| <i>communicate with each other', etc.</i>                                                 |                                                                                                                                                                                                                                                                                |
| Life-skills training                                                                      | Have you received formal training (such as going on a course or to a meeting or watching videos etc.) in thinking about and planning your future - that is, relationships, education, training, work, finances, etc.? This would be training related to having your condition. |
| Yes <span style="float: right;">No</span>                                                 |                                                                                                                                                                                                                                                                                |
| <i>The training would be holistic, not just about managing the YP's health condition.</i> |                                                                                                                                                                                                                                                                                |

**Question for parent/carer:**

|       |                                                                                    |                                  |                            |
|-------|------------------------------------------------------------------------------------|----------------------------------|----------------------------|
| P (c) | Do you feel you have been involved and consulted about your young person's health? |                                  |                            |
| Yes   |                                                                                    | No                               |                            |
| P (d) | Was it at the right level?                                                         |                                  | Was it at the right level? |
|       | Yes                                                                                | No, too little      No, too much | Yes      No, too little    |

**Question from medical records:**

|              |                                                                                               |    |  |
|--------------|-----------------------------------------------------------------------------------------------|----|--|
| Co-ordinator | Is there evidence of a coordinator who makes sure services for transition work well together? |    |  |
| Yes          |                                                                                               | No |  |
